# Supplementary material for: Genotype–Phenotype Correlations in Alport Syndrome—A Single-Center Experience
Source: MDPI journal article supplement (doi:10.3390/genes15050593), 2024-05-07
Supplement: s1 [file s1]

**SUPPLEMENTARY MATERIAL**

Table S1. Genetic and clinical characteristics of patients with multiple type IV collagen variants

| Variant no. 3 |           | Laboratory findings at referral |                       |                     |             |                 | Outcomes      |                   |
|---------------|-----------|---------------------------------|-----------------------|---------------------|-------------|-----------------|---------------|-------------------|
| Consequence   | Inertance | Serum creatinine (mg/dl)        | eGFR (ml/min/1.73 m2) | Proteinuria (g/day) | Hematuria   | ESKD            | Age ESKD (y.) | Kidney transplant |
| NA            | NA        | 8.9                             | 7                     | NA                  | Absent      | Yes (referral)  | 38            | No                |
| NA            | NA        | 1                               | 80                    | NA                  | Absent      | Yes (referral)  | 16            | Yes (16 y.)       |
| NA            | NA        | 2.54                            | 22                    | 2.9                 | Microscopic | No              | NA            | No                |
| NA            | NA        | 1.36                            | 54                    | NA                  | Absent      | Yes (referral)  | 25            | Yes (26 y.)       |
| NA            | NA        | 3.62                            | 15                    | 1.14                | Microscopic | Yes (follow-up) | 46            | No                |
| In frame      | AD, AR    | 8.36                            | 8                     | NA                  | Absent      | Yes (referral)  | 40            | No                |

Variant no. 2

| Zygosity | Pathogenicity | Consequence | Inheritance | Gene   | Position<br>(Exon) | Nucleotide<br>change | Amino acid<br>change | Zygosity | Pathogenicity |
|----------|---------------|-------------|-------------|--------|--------------------|----------------------|----------------------|----------|---------------|
| HET      | LPV           | Missense    | AD, AR      | NA     | NA                 | NA                   | NA                   | NA       | NA            |
| HET      | PV            | Frame shift | AD, AR      | NA     | NA                 | NA                   | NA                   | NA       | NA            |
| HET      | VUS           | Missense    | AD, AR      | NA     | NA                 | NA                   | NA                   | NA       | NA            |
| HET      | VUS           | Non-coding  | AD, AR      | NA     | NA                 | NA                   | NA                   | NA       | NA            |
| HET      | LPV           | Missense    | AD, AR      | NA     | NA                 | NA                   | NA                   | NA       | NA            |
| HEM      | LPV           | Missense    | X-linked    | COL4A3 | 41                 | c.3546_3548dup<br>p  | p.(Gly1183dup)       | HET      | VUS           |

Variant no. 1

| Nucleotide change | Amino acid change   | Zygoty | Pathogenicity | Consequence | Inheritance | Gene   | Position (Exon) | Nucleotide change | Amino acid change  |
|-------------------|---------------------|--------|---------------|-------------|-------------|--------|-----------------|-------------------|--------------------|
| c.40_63del        | P.(Leu14_Leu21del)  | HET    | PV            | In frame    | AD, AR      | COL4A3 | 26              | c.1814G>T         | p.(Gly605Val)      |
| c.4348C>T         | p.(Arg1450*)        | HET    | PV            | Non-sense   | AD, AR      | COL4A3 | 25              | c.1716del         | p.(Pro573Leufs*80) |
| c.2734G>C         | P.(Gly912Arg)       | HET    | LPV           | Missense    | AD, AR      | COL4A4 | 48              | c.4941G>C         | p.(Lys1647Asn)     |
| c.2746+1G>T       | p.?                 | HET    | PV            | Non-coding  | AD, AR      | COL4A3 | Intron 48       | c.4463-11T>C      | p.?                |
| c.1855G>A         | P.(Gly619Arg)       | HET    | LPV           | Missense    | AD, AR      | COL4A3 | 5               | c.289G>A          | p.(Gly97Arg)       |
| c.3961del         | p.(Asp1321Metfs*67) | HET    | PV            | Frame shift | AD, AR      | COL4A5 | 3               | c.160G>C          | p.(Gly54Arg)       |

| Patient Number | Sex    | Age – clinical debut (y.) | Age – genetic testing (y.) | Kidney biopsy (result) | Gene   | Position (Exon) |
|----------------|--------|---------------------------|----------------------------|------------------------|--------|-----------------|
| 6              | Male   | 27                        | 48                         | No                     | COL4A3 | 1               |
| 10             | Female | Not known                 | 32                         | No                     | COL4A3 | 48              |
| 17             | Female | 40                        | 53                         | Yes (FSGS)             | COL4A4 | 31              |
| 29             | Female | 22                        | 26                         | No                     | COL4A3 | Intron 14       |
| 34             | Female | 42                        | 47                         | Yes (AS)               | COL4A3 | 26              |
| 36             | Male   | 33                        | 39                         | No                     | COL4A4 | 41              |

AD – Autosomal Dominant; AR – Autosomal Recessive; AS – Alport syndrome; COL4A3 – the alpha 3 chain of the collagen type IV molecule; COL4A4 – the alpha 3 chain of the collagen type IV molecule; COL4A5 – the alpha 5 chain of the collagen type IV molecule; Complex – Alport syndrome with complex inheritance; ESKD – end-stage kidney disease; FSGS - focal and segmental glomerulosclerosis; GFR – glomerular filtration rate; HEM – hemizygous; HET – heterozygous; HOM – homozygous; LPV – likely pathogenic variant; PV – pathogenic variant; VUS – variant of uncertain significance.

Table S2. Genetic and clinical characteristics of patients having a variant of uncertain significance

| Variant       |             | Laboratory findings at referral |                          |                                   |                     | Outcomes    |             |
|---------------|-------------|---------------------------------|--------------------------|-----------------------------------|---------------------|-------------|-------------|
| Pathogenicity | Consequence | Inheritance                     | Serum creatinine (mg/dl) | eGFR (ml/min/1.73m <sup>2</sup> ) | Proteinuria (g/day) | Hematuria   | ESKD (age)  |
| VUS           | In frame    | AD, AR                          | 6.46                     | 11                                | 4                   | Microscopic | Yes (28 y.) |
| VUS           | Missense    | AD, AR                          | 1.4                      | 48                                | 2                   | Microscopic | No          |
| VUS           | Missense    | AD, AR                          | 9.46                     | 6                                 | NA                  | NA          | Yes (42 y.) |
| VUS           | Missense    | AD, AR                          | 1.02                     | 87                                | NA                  | Absent      | No          |
| VUS           | Missense    | AD, AR                          | 2.2                      | 42                                | 2.5                 | Absent      | No          |
| VUS           | Non-coding  | AD, AR                          | 2.5                      | 30                                | 4.34                | Microscopic | Yes (57 y.) |

| Sex    | Age – genetic testing (y.) | Age – clinical debut (y.) | Kidney biopsy (result) | Gene   | Position (Exon) | Nucleotide change               | Amino acid change | Zygosity |
|--------|----------------------------|---------------------------|------------------------|--------|-----------------|---------------------------------|-------------------|----------|
| Male   | 29                         | 29                        | FSGS                   | COL4A3 | Exon 41         | c.3546_3548dup p. (Gly1183dup ) |                   | HET      |
| Female | 41                         | 49                        | No                     | COL4A3 | Exon 44         | c.3925C>T                       | p.(Pro1309Ser)    | HET      |
| Male   | 42                         | 42                        | AS                     | COL4A4 | Exon 27         | c.2159C>T                       | p.(Pro720Leu)     | HET      |
| Male   | 54                         | 54                        | No                     | COL4A4 | Exon 48         | c.5045G>A                       | p.(Arg1682Gln)    | HET      |
| Male   | 32                         | 36                        | FSGS                   | COL4A4 | Exon 48         | c.5045G>A                       | p.(Arg1682Gln)    | HET      |
| Male   | 52                         | 56                        | Angiosclerosis         | COL4A4 | Intron 14       | c.871-3A>G                      | p.?               | HET      |

| Patient<br>Number |
|-------------------|
| 19                |
| 26                |
| 3                 |
| 23                |
| 27                |
| 35                |

AD – Autosomal Dominant; AR – Autosomal Recessive; AS – Alport syndrome; COL4A3 – the alpha 3 chain of the collagen type IV molecule; COL4A4 – the alpha 3 chain of the collagen type IV molecule; COL4A5 – the alpha 5 chain of the collagen type IV molecule; Complex – Alport syndrome with complex inheritance; ESKD – end-stage kidney disease; FSGS - focal and segmental glomerulosclerosis; GFR – glomerular filtration rate; HEM – hemizygous; HET – heterozygous; HOM – homozygous; LPV – likely pathogenic variant; PV – pathogenic variant; VUS – variant of uncertain significance.
